# Supplementary material for: Enhanced visible and near infrared emissions via Ce3+to Ln3+energy transfer in Ln3+-doped CeF3nanocrystals (Ln = Nd and Sm)
Source: Royal Society of Chemistry journal article supplement (doi:10.1039/c5dt02974k), 2015-11-17
Supplement: c5dt02974k1.pdf [file c5dt02974k1.pdf]

## Electronic Supporting Information

### Enhanced visible and near infrared emissions via Ce<sup>3+</sup> to Ln<sup>3+</sup> energy transfer in Ln<sup>3+</sup>-doped CeF<sub>3</sub> nanocrystals (Ln=Nd and Sm)<sup>†</sup>

*Tuhin Samanta<sup>a</sup>, Shyam Sarkar<sup>a</sup>, Venkata. N. K. B. Adusumalli<sup>a</sup>, Athma E. Praveen<sup>a</sup> and Venkataramanan Mahalingam<sup>a\*</sup>*

<sup>a</sup> *Department of Chemical Sciences, Indian Institute of Science Education and Research (IISER), Kolkata, Mohanpur, West Bengal 741252, India.*

**Table 1: Fractional co-ordinates and lattice parameters used in the VESTA program are given below.**

Lattice parameter are, a=7.139, b=7.139, c= 7.266,  $\alpha=90^\circ$ ,  $\beta=90^\circ$  and  $\lambda=120^\circ$

| Atom | Level | x        | y        | z        | g     | B |
|------|-------|----------|----------|----------|-------|---|
| F    | 2a    | 0.000000 | 0.000000 | 0.250000 | 1.000 | 1 |
| F    | 6f    | 0.333333 | 0.666667 | 0.186200 | 1.000 | 1 |
| Ce   | 4d    | 0.338400 | 0.000000 | 0.250000 | 1.000 | 1 |
| F    | 12g   | 0.356800 | 0.316500 | 0.083333 | 1.000 | 1 |

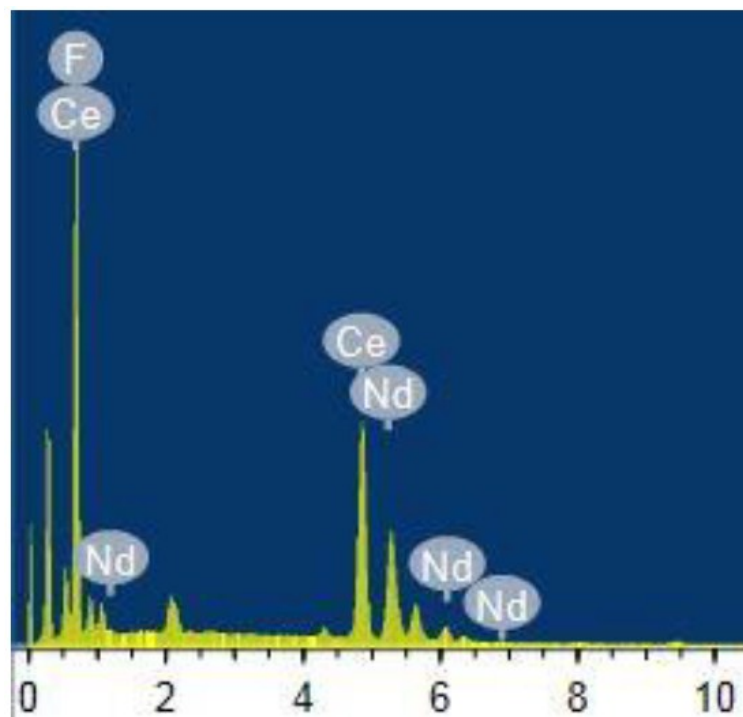

**Fig. S1.** EDAX spectrum of  $\text{Nd}^{3+}$  doped  $\text{CeF}_3$  nanocrystals confirms the presence of elements  $\text{Nd}^{3+}$ ,  $\text{Ce}^{3+}$  and  $\text{F}^-$ .

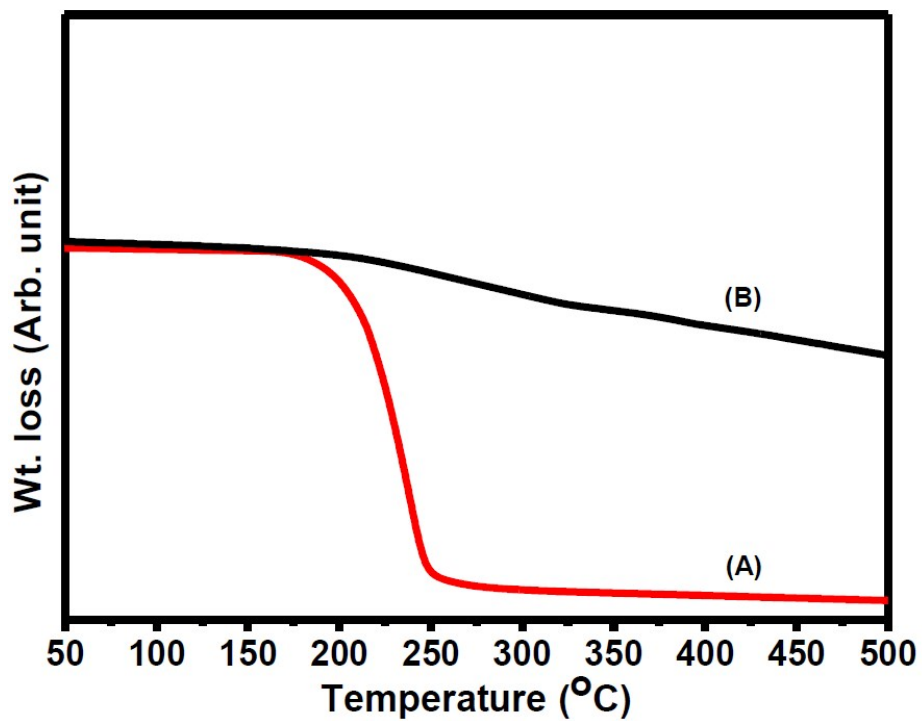

**Fig. S2.** TGA results for free PVP (A) and citrate capped  $\text{Nd}^{3+}$ -doped  $\text{CeF}_3$  nanocrystals (B).

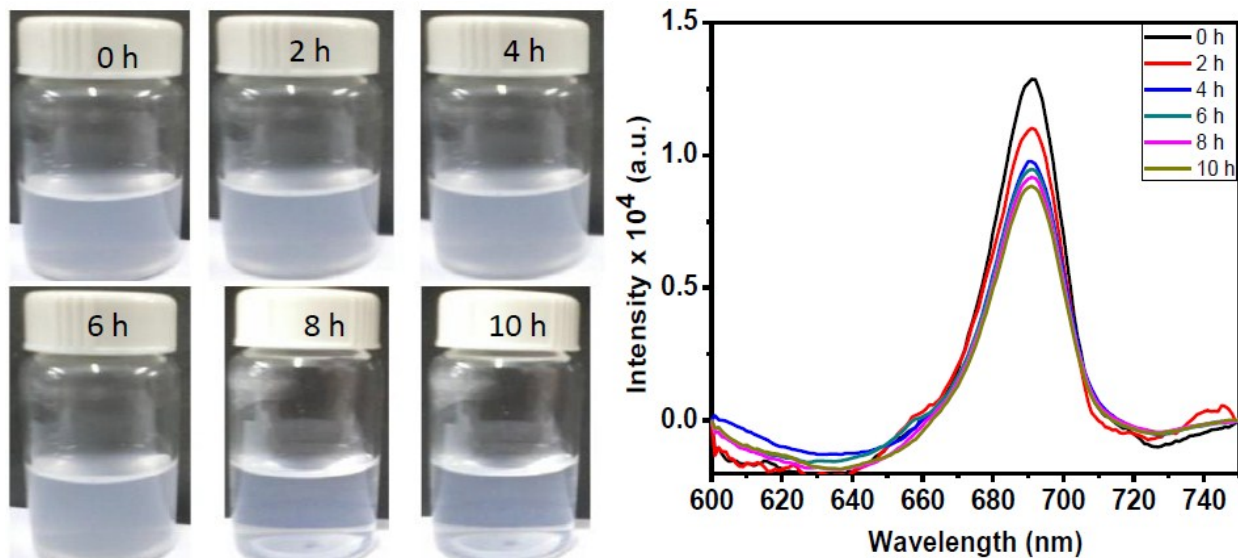

**Fig. S3.** Digital images of  $\text{Nd}^{3+}$  doped  $\text{CeF}_3$  nanocrystals dispersed in water and measured at different time intervals along with the corresponding photoluminescence spectra (right side).

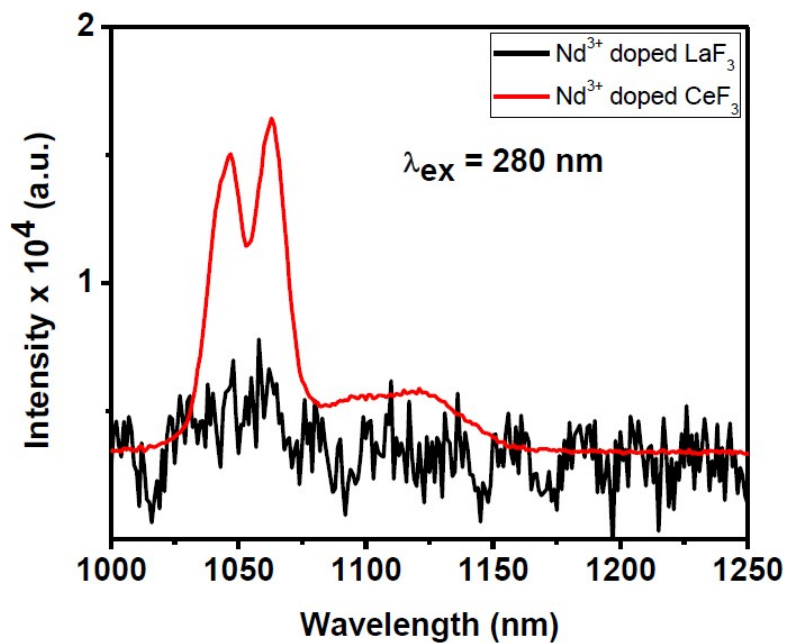

**Fig. S4.** Emission spectra of  $\text{Nd}^{3+}$  doped  $\text{LaF}_3$  and  $\text{Nd}^{3+}$  doped  $\text{CeF}_3$  nanocrystals, upon excitation at 280 nm in water.

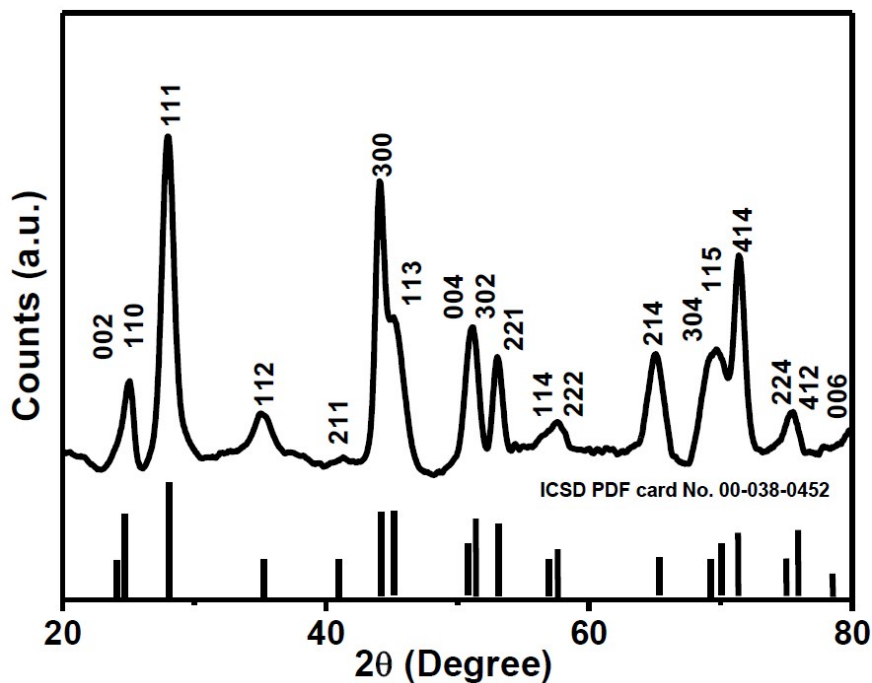

**Fig. S5.** Powder XRD patterns of (a) Sm<sup>3+</sup>-doped CeF<sub>3</sub> nanocrystals and (b) standard XRD pattern of hexagonal CeF<sub>3</sub> crystals (ICSD PDF Card No-00-038-0452).

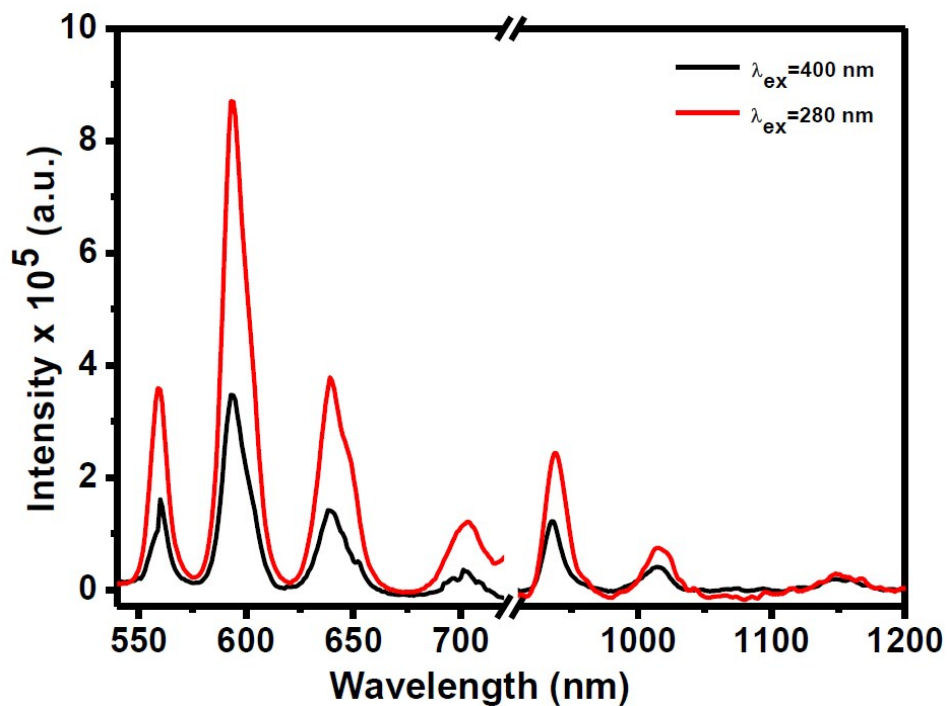

**Fig. S6.** PL spectra collected from Sm<sup>3+</sup>-doped CeF<sub>3</sub> nanocrystals via Ce<sup>3+</sup> ions excitation (280 nm) and direct excitation (400 nm).

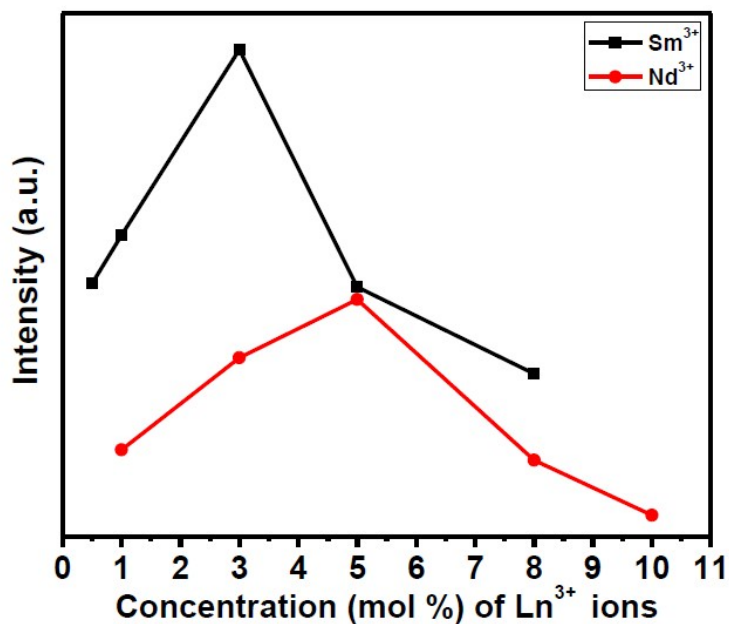

**Fig. S7.** Plot of dopant ( $\text{Sm}^{3+}$  and  $\text{Nd}^{3+}$  ions) concentrations versus the emission intensity of  $\text{Nd}^{3+}$  and  $\text{Sm}^{3+}$  individually doped in  $\text{CeF}_3$  nanocrystals.

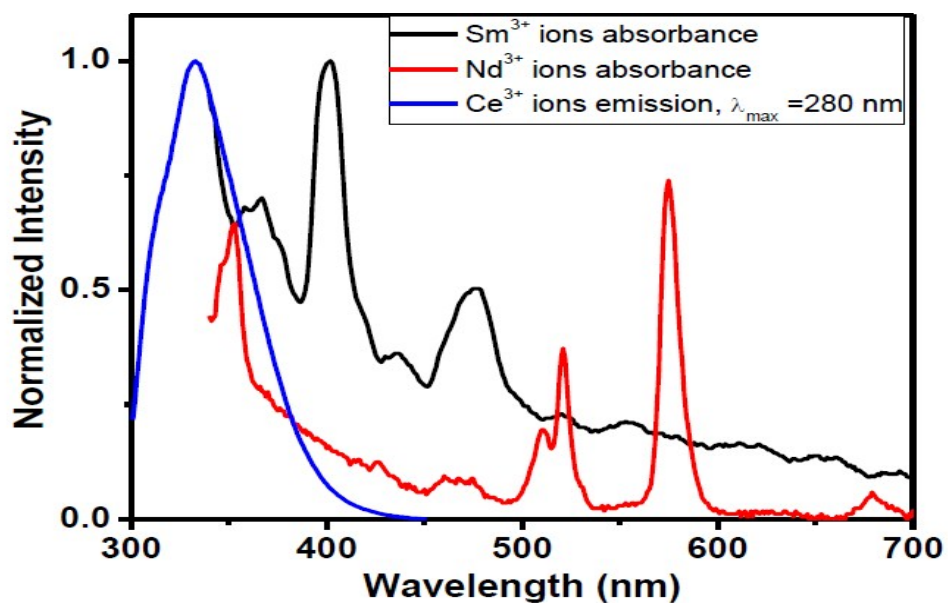

**Fig. S8.** Comparison of the emission spectrum of  $\text{Nd}^{3+}$ -doped  $\text{CeF}_3$  nanocrystals with that of the absorbance spectra of  $\text{Sm}^{3+}$  and  $\text{Nd}^{3+}$  ions.

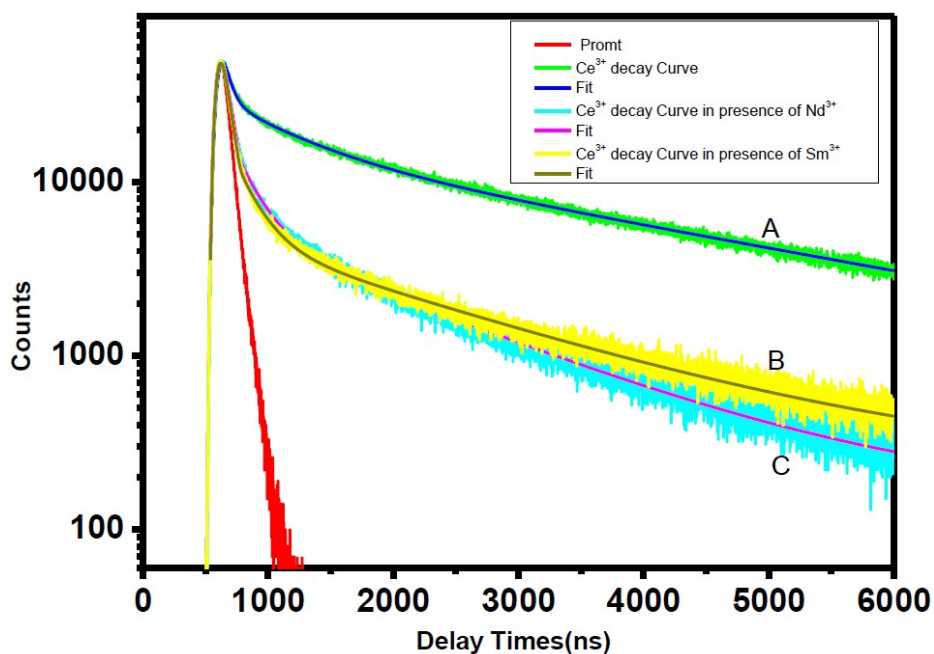

**Fig. S9. Lifetime decay curves** of Ce<sup>3+</sup> ions in CeF<sub>3</sub> nanocrystals (A), Nd<sup>3+</sup> doped CeF<sub>3</sub> nanocrystals (B) and Sm<sup>3+</sup> doped CeF<sub>3</sub> nanocrystals (C) collected using Time-Correlated Single Photon counting spectroscopy. The nanocrystals were excited at 290 nm and the emission was monitored at 330 nm.

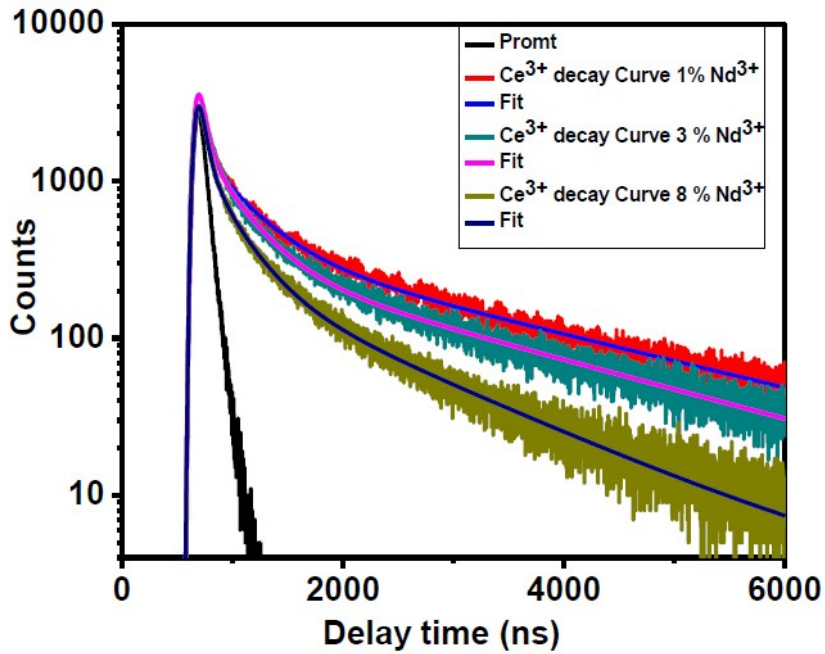

**Fig. S10.** Lifetimes decay curves of  $\text{Ce}^{3+}$  emission in  $\text{Nd}^{3+}$ -doped  $\text{CeF}_3$  nanocrystals upon excitation at 280 nm.

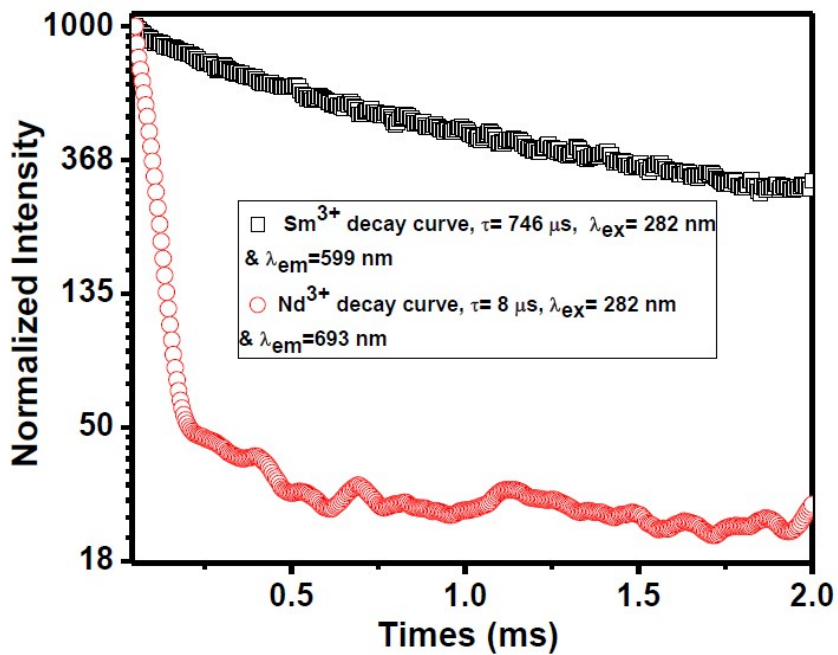

**Fig. S11.** Lifetimes decay curves of  $\text{Sm}^{3+}$  and  $\text{Nd}^{3+}$  ions in  $\text{CeF}_3$  nanocrystals upon excitation at 280 nm. The monitored and emission wavelengths are 599 nm and 693 nm, respectively.
